# Supplementary material
Source: PubMed Central journal article supplement (PMC5943640)

## Supplementary Online Content

Munshi NC, Avet-Loiseau H, Rawstron A, Owen RG, Child JA, et al. Association of minimal residual disease with superior survival outcomes in patients with multiple myeloma: a meta-analysis. *JAMA Oncol*. doi:10.1001/jamaoncol.2016.3160

**eTable.** Treatment information and patient population data of included studies

**eFigure.** Overall survival in patients achieving CR according to cytogenetic risk category (FISH) and MRD status. CR, complete response; FISH, fluorescent in situ hybridization; MRD, minimal residual disease; OS, overall survival

This supplementary material has been provided by the authors to give readers additional information about their work.

**Supplementary Table 1.** Treatment information and patient population data of included studies

| Reference       | Study design                                       | Follow-up, (mo)   | N  | Study objective                                                                                        | Age range, (years) | MRD detection method | Time of MRD assessment                                              | ISS                                          | Statistics                                                                               | Regimen                                                   | Maintenance        | Depth of response                                                                     |
|-----------------|----------------------------------------------------|-------------------|----|--------------------------------------------------------------------------------------------------------|--------------------|----------------------|---------------------------------------------------------------------|----------------------------------------------|------------------------------------------------------------------------------------------|-----------------------------------------------------------|--------------------|---------------------------------------------------------------------------------------|
| Rawstron 2002   | Prospective                                        | up to 39          | 45 | Whether MFC results (levels of malignant vs normal plasma cells) predict outcomes after HDT and SCT    | 41–65              | MFC                  | 3 months after Tx; 3–6 month intervals thereafter                   | NS                                           | Univariate (log-rank test) and multivariate (Cox-regression) analysis                    | C-VAMP followed by MEL + HD ASCT                          | None               | Following induction: 22% CR, 78% PR<br><br>Following HD: 73% CR: 42% MRD <sup>+</sup> |
| San Miguel 2002 | Prospective, randomized, multicenter PETHEMA trial | 65 (PFS), 53 (OS) | 87 | Determine whether changes in the plasma cell compartment (MRD using MFC) could predict disease outcome | 31–70              | PCR                  | 3 months after ASCT, 1 month after 12 cycles chemotherapy           | 58–61% stage II<br>39–42% stage III          | Mann-Whitney U, Wilcoxon for between-group differences. Kaplan-Meier for survival curves | VBMCP/VBAD followed by ASCT or 8 cycles chemotherapy      | IFN $\alpha$ + DEX | MRD <sup>-</sup> : 36% of ASCT patients vs 15% CT patients (p=0.04)                   |
| Ferrero 2014    | GIMEMA trial                                       | 93                | 39 | Impact of MRD kinetics on survival when using VTD consolidation                                        | 42–69              | PCR                  | After 2 VTD courses, end of treatment, every 6 months until relapse | NS                                           | Univariate Cox proportional hazards model                                                | VTD, MEL, ASCT                                            | None               | Full MRD: 18%<br><br>Major MRD: 67%                                                   |
| Bakkus 2004     | NS                                                 | NS                | 67 | Whether post-SCT tumor load predicts duration of response                                              | 30–65              | PCR                  | 3–6 months post-HDT                                                 | 12% stage IIA, 47% stage IIIA, 8% stage IIIB | Log-rank test                                                                            | VAD, MEL $\pm$ TBI with single or tandem autologous PBSCT | None               | 28% CR                                                                                |

|               |                                       |    |                          |                                                                     |         |     |                                              |                                          |                                           |                                                      |                      |                                           |
|---------------|---------------------------------------|----|--------------------------|---------------------------------------------------------------------|---------|-----|----------------------------------------------|------------------------------------------|-------------------------------------------|------------------------------------------------------|----------------------|-------------------------------------------|
| Dal Bo 2013   | Prospective                           | 18 | 44                       | Whether presence of MRD 3 months post-SCT predicts relapse or death | 52.2–64 | MFC | 3 months                                     | NS                                       | Log-rank test                             | MEL, ASCT                                            | None                 | 32.6% CR, 40% MRD <sup>-</sup>            |
| Paiva 2011    | Prospective                           | 32 | 102                      | Prognostic value of MFC vs IF vs SFLC                               | 65–84   | MFC | After 6 cycles of induction                  | 29% stage I, 38% stage II, 33% stage III | Two-sided log-rank test                   | VMP vs VTP for 6 cycles                              | VT vs VP for max 3 y | CR 43%, MRD 30%                           |
| Paiva 2008    | Prospective                           | 57 | 295                      | Prognostic value of post-SCT MFC remission                          | 29–70   | MFC | 100 days                                     | 39% stage I, 41% stage II, 20% stage III | Log-rank test                             | VBMCP/VBAD, MEL, ASCT                                | None                 | 50% CR, 42% MRD <sup>-</sup>              |
| Korthals 2012 | NS                                    | 61 | 53                       | Whether pre- and post-SCT MRD status predicts EFS/OS                | 31–75   | PCR | 3–6 months after SCT                         | 11% stage I+II, 89% stage III            | Kaplan-Meier plots and the log-rank test  | Idarubicin/dexamethasone induction, MEL, ASCT        | IFN or THAL          | 25% nCR, 21% MRD <sup>-</sup>             |
| Korthals 2013 | Retrospective                         | 45 | 42                       | Whether MRD status in PB predicts remission status                  | 31–66   | PCR | 3 mo                                         | 12% Stage I+II, 88% Stage III            | Kaplan-Meier plots and the log rank test. | Idarubicin/dexamethasone induction, MEL, ASCT        | IFN or THAL          | 28% CR                                    |
| Swedin 1998   | NS                                    | 29 | 36                       | Utility and clinical value of ASO-PCR to evaluate MRD               | 31–60   | PCR | 3 + 6 months after ASCT, 6 months thereafter | NS                                       | Log rank test                             | VAD, MEL, ASCT                                       | IFN                  | 50% CR                                    |
| Rawstron 2013 | Prospective                           | 71 | 397 (INT) and 245 (nINT) | Prognostic value of MRD, measured using MFC, on outcomes            | NS      | MFC | 100 days after ASCT (intensive pathway only) | NS                                       | Fisher's exact test                       | CTD vs CVAD (INT) or CTDa vs MP (nINT), MEL and ASCT | THAL vs no THAL      | MRD <sup>-</sup> 62% (INT) and 15% (nINT) |
| Roussel 2014  | Prospective, multicenter, single-arm, | 39 | 31                       | Response with RVD induction/consolidation                           | 33–65   | MFC | Baseline, post-induction/pre-ASCT, post-     | 48% stage I, 36%                         | Kaplan-Meier                              | RVD, MEL, ASCT                                       | LEN for 1 year       | 58% CR, 68% MDR <sup>-</sup>              |

|                 |                                               |      |    |                                                          |               |     |                                                           |                                                   |                                                                                      |                                                      |           |                                         |
|-----------------|-----------------------------------------------|------|----|----------------------------------------------------------|---------------|-----|-----------------------------------------------------------|---------------------------------------------------|--------------------------------------------------------------------------------------|------------------------------------------------------|-----------|-----------------------------------------|
|                 | open-label, phase II study                    |      |    |                                                          |               |     | ASCT, post-consolidation, end of treatment                | stage II, 16% stage III                           |                                                                                      |                                                      |           |                                         |
| Fukamoto 2016   | Retrospective                                 | 40.9 | 78 | Impact of immunophenotypic CR (MFC) on survival outcomes | 44–87         | MFC | Bone marrow samples taken at presentation, and at VGPR/CR | 53% stage III                                     | Univariate analysis and multivariate analysis using a Cox proportional hazards model | 87% IMiD-based regimens and 94% BORT-based therapies | BORT+ DEX | 44% iCR                                 |
| Sarasquete 2005 | Prospective (GEMM2000)                        | NS   | 32 | Compare ASO real-time qPCR vs MFC for MRD monitoring     | 59 ± (SD) 9.7 | PCR | 3 months after transplant                                 | NS                                                | Mann-Whitney U and Kruskal-Wallis tests                                              | VBCMP/VBAD, MEL, ASCT                                | None      | 58% IF <sup>+</sup> CR                  |
| Ludwig 2015     | Randomized, open-label, multicenter, phase II | 33   | 98 | Response rates after VTD vs VTDC induction               | 33–68         | MFC | 40–269 days after SCT                                     | 18–24% stage I, 45–47% stage II, 31–35% stage III | NS                                                                                   | VTD vs VTDC, single or double ASCT                   | None      | MRD <sup>-</sup> : 53% (VTD) 33% (VTDC) |

Abbreviations: ASCT = autologous stem cell transplantation; BORT = bortezomib; C-VAMP = cyclophosphamide, vincristine, adriamycin plus methylprednisolone; CR = complete response; CT = chemotherapy; CTD = cyclophosphamide-thalidomide-dexamethasone; CTDa= attenuated CTD; CVAD = cyclophosphamide-vincristine-doxorubicin-dexamethasone; DEX = dexamethasone; HD = high-dose; IF = immunofixation; IFN $\alpha$  = interferon alfa; INT = intensive pathway; MEL = melphalan; MFC = multiparameter flow cytometry; mo = months; MP = melphalan-prednisolone; MRD = minimal residual disease; nINT = non-intensive pathway; NS = not specified; PFS = progression-free survival; OS = overall survival; PBSCT = peripheral blood stem cells transplant; PR = partial response; (q)ASO-PCR = (quantitative) allele-specific oligonucleotide polymerase chain reaction; SCT = stem cell transplantation; sFLC = serum free light chain; TBI = total body irradiation; THAL = thalidomide; Tx = transplantation; VBAD = vincristine-bis-chloroethylnitrosourea-doxorubicin-dexamethasone; VBMCP = vincristine-bis-chloroethylnitrosourea-melphalan-cyclophosphamide-prednisone; VMP = bortezomib-melphalan-prednisolone; VP = bortezomib-prednisolone; VT = bortezomib-thalidomide; VTD = bortezomib-thalidomide-dexamethasone; VTDC = bortezomib-thalidomide-dexamethasone-cyclophosphamide; VTP = bortezomib-thalidomide-prednisolone

© 2016 American Medical Association. All rights reserved.

© 2016 American Medical Association. All rights reserved.

**Supplementary Figure.** Overall survival in patients achieving CR according to cytogenetic risk category (FISH) and MRD status. CR, complete response; FISH, fluorescent in situ hybridization; MRD, minimal residual disease; OS, overall survival.

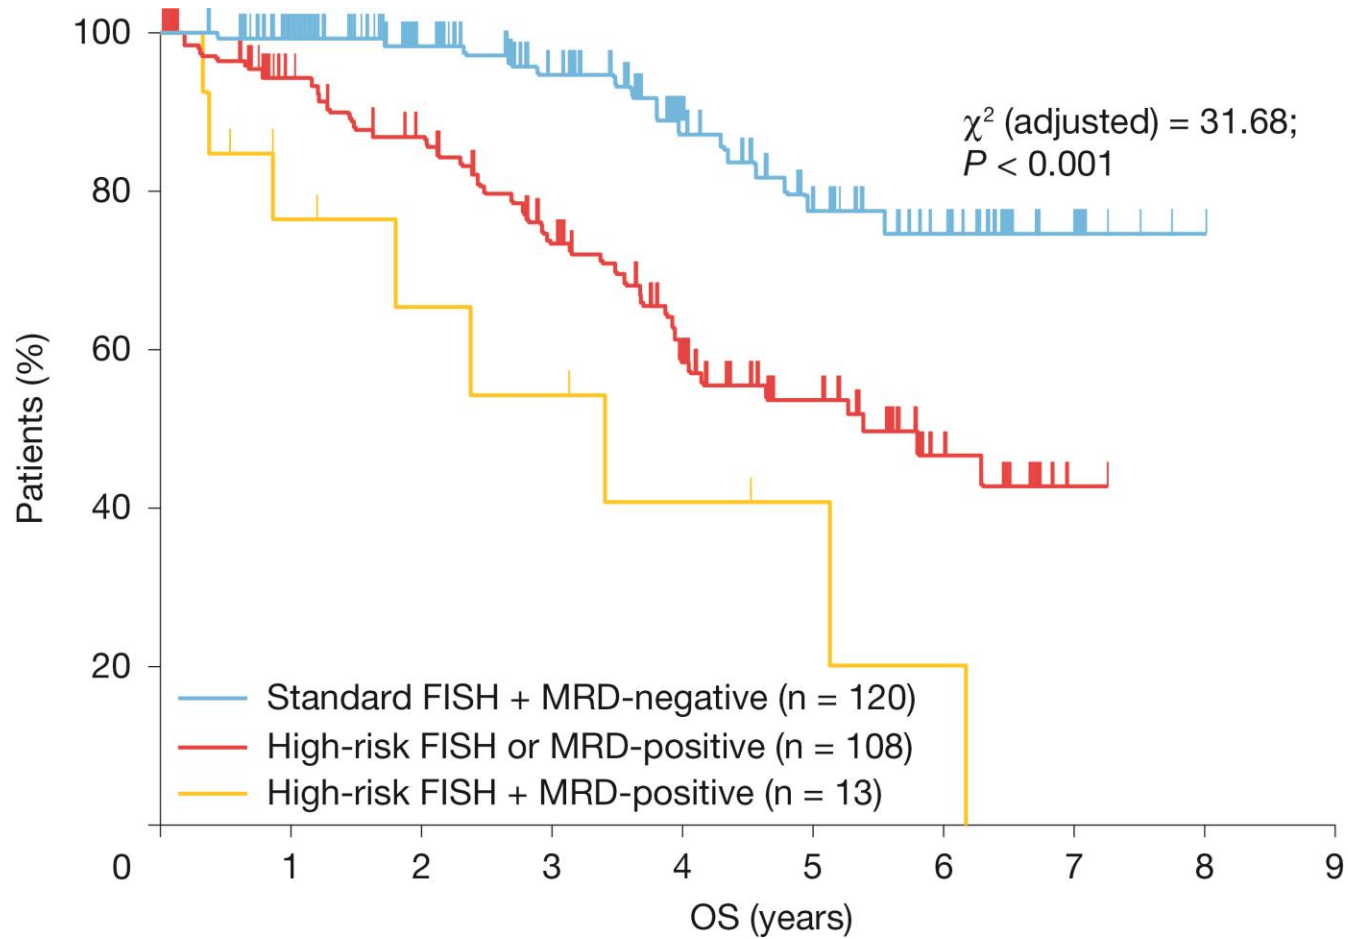

Supplement: NIHMS874697-supplement-supplemental.pdf [file NIHMS874697-supplement-supplemental.pdf]
